# Supplementary material
Source: Springer Nature journal article supplement (https://www.springermedizin.de/resource/supplementary/12891_2010_1117_MOESM2_ESM.pdf/9507732)

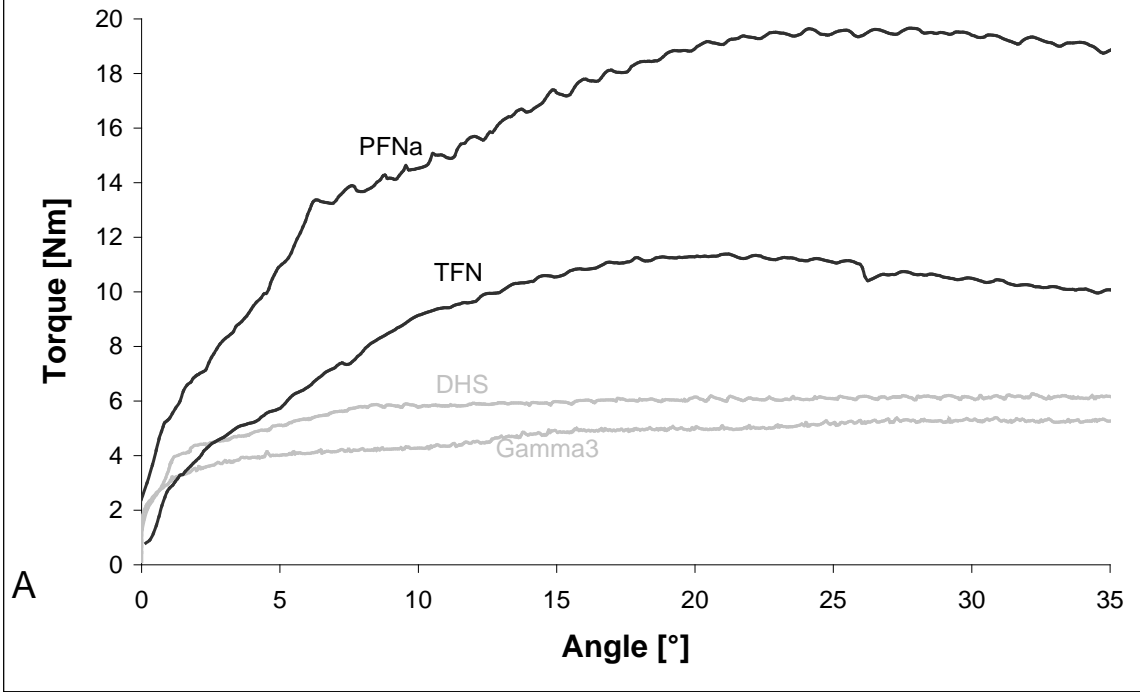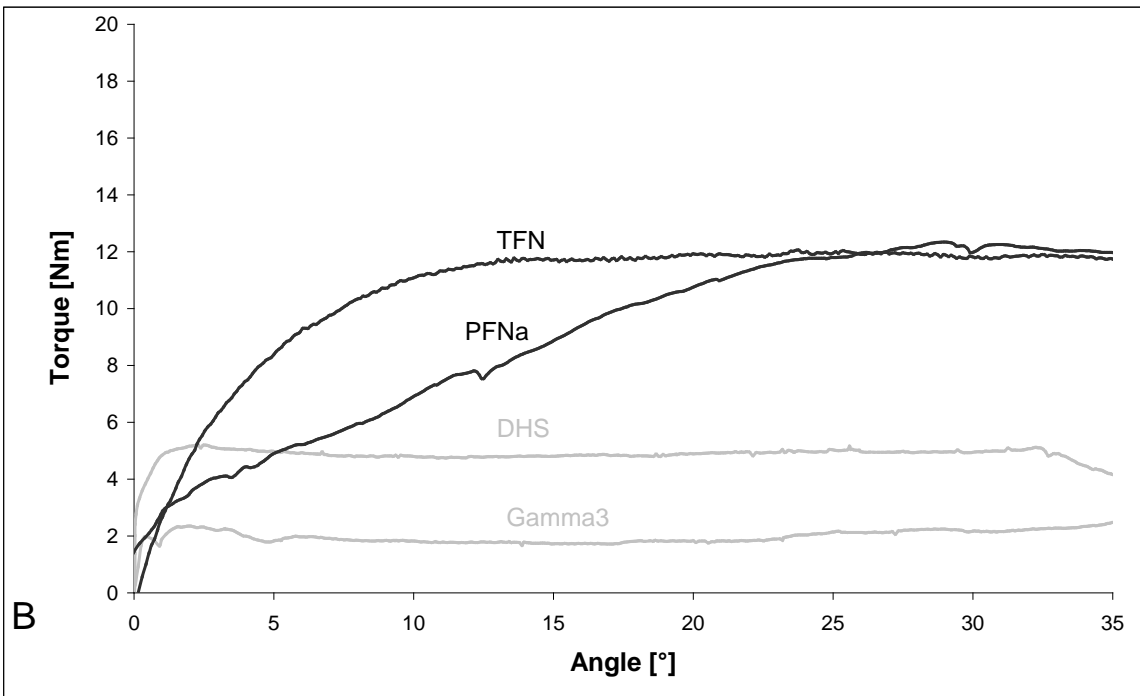

Supplement: MOESM2 [file 9507732]
